# Supplementary material for: Evaluation of Psychological and Physical Violence towards Children and Adolescents before and during the COVID-19 Pandemic in the Lodz Voivodship
Source: MDPI journal article supplement (doi:10.3390/brainsci14010024), 2023-12-25
Supplement: s1 [file s1]

**Supplementary Table S1.** Detailed baseline characteristics

|                             |                                | Whole study group | Psychological violence |                     | Physical violence   |                     |
|-----------------------------|--------------------------------|-------------------|------------------------|---------------------|---------------------|---------------------|
|                             |                                |                   | Before the pandemic    | During the pandemic | Before the pandemic | During the pandemic |
| Whole study group           |                                | 782               | 131 (16.8%)            | 115 (14.7%)         | 50 (6.4%)           | 27 (3.5%)           |
| Age (years)                 |                                | 14.53±2.60        | 15.46 ±1.97            | 15.24 ±1.98         | 14.82 ±2.08         | 13.93 ±2.50         |
| Age                         | Under 15                       | 317 (40.5%)       | 31 (9.8%)              | 33 (10.4%)          | 18 (5.7%)           | 14 (4.4%)           |
|                             | 15 and above                   | 465 (59.5%)       | 100 (21.5%)            | 82 (17.6%)          | 32 (6.9%)           | 13 (2.8%)           |
| Gender                      | Female                         | 293 (37.5%)       | 34 (11.6%)             | 31 (10.6%)          | 23 (7.8%)           | 13 (4.4%)           |
|                             | Male                           | 486 (62.1%)       | 96 (19.8%)             | 83 (17.1%)          | 27 (5.6%)           | 14 (2.9%)           |
|                             | Non-binary                     | 3 (0.4%)          | 1 (33.3%)              | 1 (33.3%)           | 0 (0.0%)            | 0 (0.0%)            |
| Pandemic wave               | 2nd                            | 480 (61.4%)       | 79 (16.5%)             | 70 (14.6%)          | 26 (5.4%)           | 15 (3.1%)           |
|                             | 4th                            | 302 (38.6%)       | 52 (17.2%)             | 45 (14.9%)          | 24 (7.9%)           | 12 (4.0%)           |
| Residence                   | City of more than 100 thousand | 64 (8.2%)         | 15 (23.4%)             | 7 (10.9%)           | 5 (7.8%)            | 2 (3.1%)            |
|                             | City of 20-100 thousand        | 241 (30.8%)       | 54 (22.4%)             | 44 (18.3%)          | 16 (6.6%)           | 11 (4.6%)           |
|                             | Town of 10-20 thousand         | 84 (10.7%)        | 10 (11.9%)             | 12 (14.3%)          | 4 (4.8%)            | 2 (2.4%)            |
|                             | Town of less than 10,000       | 38 (4.9%)         | 3 (7.9%)               | 4 (10.5%)           | 2 (5.3%)            | 2 (5.3%)            |
|                             | Village                        | 355 (45.4%)       | 49 (13.8%)             | 48 (13.5%)          | 23 (6.5%)           | 10 (2.8%)           |
| Building                    | Block of flats                 | 197 (25.2%)       | 32 (16.2%)             | 26 (13.2%)          | 14 (7.1%)           | 7 (3.6%)            |
|                             | Terraced house                 | 39 (5.0%)         | 7 (17.9%)              | 8 (20.5%)           | 1 (2.6%)            | 0 (0.0%)            |
|                             | Detached house                 | 546 (69.8%)       | 92 (16.8%)             | 81 (14.8%)          | 35 (6.4%)           | 20 (3.7%)           |
| Room                        | Own room                       | 15 (1.9%)         | 4 (26.7%)              | 3 (20%)             | 2 (13.3%)           | 1 (6.7%)            |
|                             | Shared with someone            | 111 (14.2%)       | 20 (18%)               | 16 (14.4%)          | 8 (7.2%)            | 4 (3.6%)            |
|                             | no own                         | 656 (83.9%)       | 107 (16.3%)            | 96 (14.6%)          | 40 (6.1%)           | 22 (3.4%)           |
| Number of household members | 2                              | 49 (6.3%)         | 8 (16.3%)              | 7 (14.3%)           | 3 (6.1%)            | 2 (4.1%)            |
|                             | 3                              | 185 (23.7%)       | 39 (21.1%)             | 30 (16.2%)          | 16 (8.6%)           | 12 (6.5%)           |
|                             | 4                              | 317 (40.5%)       | 49 (15.5%)             | 45 (14.2%)          | 17 (5.4%)           | 9 (2.8%)            |
|                             | 5                              | 145 (18.5%)       | 26 (17.9%)             | 25 (17.2%)          | 11 (7.6%)           | 4 (2.8%)            |
|                             | 6 and more                     | 86 (11.0%)        | 9 (10.5%)              | 8 (9.3%)            | 3 (3.5%)            | 0 (0.0%)            |
| Siblings                    | 0                              | 154 (19.7%)       | 27 (17.5%)             | 18 (11.7%)          | 9 (5.8%)            | 3 (1.9%)            |
|                             | 1                              | 431 (55.1%)       | 75 (17.4%)             | 65 (15.1%)          | 26 (6%)             | 15 (3.5%)           |
|                             | 2                              | 142 (18.2%)       | 22 (15.4%)             | 22 (15.4%)          | 11 (7.7%)           | 7 (4.9%)            |
|                             | 3                              | 38 (4.8%)         | 6 (15.8%)              | 7 (18.4%)           | 3 (7.9%)            | 1 (2.6%)            |
|                             | 4 and more                     | 17 (2.2%)         | 1 (5.9%)               | 3 (17.6%)           | 1 (5.9%)            | 1 (5.9%)            |
| Education step              | Primary school                 | 371 (47.4%)       | 43 (11.6%)             | 40 (10.8%)          | 24 (6.5%)           | 15 (4%)             |
|                             | Secondary school               | 333 (42.6%)       | 74 (22.2%)             | 63 (18.9%)          | 22 (6.6%)           | 11 (3.3%)           |
|                             | Profiled high school           | 19 (2.4%)         | 6 (31.6%)              | 4 (21.1%)           | 1 (5.3%)            | 1 (5.3%)            |
|                             | Technical school               | 54 (6.9%)         | 7 (13%)                | 7 (13%)             | 2 (3.7%)            | 0 (0.0%)            |
|                             | Vocational school              | 5 (0.7%)          | 2 (40.0%)              | 1 (20.0%)           | 1 (20.0%)           | 0 (0.0%)            |
| Type of school lessons      | Stationary                     | 42 (5.4%)         | 3 (7.1%)               | 4 (9.5%)            | 5 (11.9%)           | 3 (7.1%)            |
|                             | Remote                         | 707 (90.4%)       | 121 (17.1%)            | 108 (15.3%)         | 42 (5.9%)           | 21 (3%)             |
|                             | Hybrid                         | 33 (4.2%)         | 7 (21.2%)              | 3 (9.1%)            | 3 (9.1%)            | 3 (9.1%)            |

The results for continuous variables are shown as mean ± standard deviation, while for categorical variables as a number of subjects (percentage of the group).
